# Simulations of particle tracking in the oligociliated mouse node and implications for left-right symmetry breaking mechanics

M.T. Gallagher\*, T.D. Montenegro-Johnson and D.J. Smith

School of Mathematics, University of Birmingham, Birmingham, B15 2TT. UK.

## Abstract

The concept of internal anatomical asymmetry is familiar; usually in humans the heart is on the left and the liver is on the right, however how does the developing embryo know to produce this consistent laterality? Symmetry breaking initiates with left-right asymmetric cilia-driven fluid mechanics in a small fluid-filled structure called the ventral node in mice. However the question of what converts this flow into left-right asymmetric development remains unanswered. A leading hypothesis is that flow transports morphogen containing vesicles within the node, the absorption of which results in asymmetrical gene expression. To investigate how vesicle transport might result in the situs patterns observed in wildtype and mutant experiments, we extend the open source Stokes flow package, NEAREST, to consider the hydrodynamic and Brownian motion of particles in a mouse model with flow driven by one, two, and 112 beating cilia. Three models for morphogen-containing particle release are simulated to assess their compatibility with observed results in oligociliated and wildtype mouse embryos: uniformly random release, localised cilium stress induced release, and localised release from motile cilia themselves. Only the uniformly random release model appears consistent with the data, with neither localised-release model resulting in significant transport in the oligociliated embryo.

## 1 Introduction

Despite external appearances, the vertebrate body plan normally exhibits a predictable left-right asymmetry in organ placement and gut looping – in mammals typically the heart is on the left and the liver on the right. The origin of this organised symmetry-breaking – and in particular why the heart is usually on the left and not the right – is only partially understood. The role of motile cilia was initially suggested by Afzelius’s 1976 study of the sperm flagellum in men with Kartagener’s syndrome (the combination of situs inversus – the lateral transposition of the internal organs, respiratory problems and male infertility) [1, 2, 3]. The definitive picture only emerged in the 1990s, with the discovery of a ciliated node structure in early mouse embryo development [4], and subsequent confirmation of the rotational motility of the cilia and the necessary and sufficient roles of cilia-driven fluid dynamics in establishing left-right asymmetry [5, 6, 7].

Subsequent work predicted [8], observed [9, 10] and explained [11, 12, 13], the mechanical role of posterior tilt and viscous interaction with the epithelium in converting chiral information (clockwise rotation viewed tip-to-base) to lateral information (leftward transport of particles). The physical picture is shown in figure 1. Whirling cilia, positioned towards the posterior of the cell body [14], drive stronger fluid flow during the leftward part of their stroke compared to the rightward part. This process causes a ‘loopy drift’ of particles towards the left [15]. The process has been observed

---

\*Address for correspondence: [m.t.gallagher@bham.ac.uk](mailto:m.t.gallagher@bham.ac.uk)

*inter-alia* in mouse [5], rabbit [10], medakafish [10] and zebrafish [16, 17]. For further details see for example the reviews [18, 19, 20].

The conversion of this leftward transport to asymmetric gene expression has however remained an enduring problem. Two conceptual models were put forward around the time of the discovery of nodal flow: the first [5] postulated that the leftward flow caused transport of diffusible morphogen and hence concentration on the left hand side of the embryo. The second model [21] postulated that flow produces left-right asymmetric mechanical responses of immotile cilia and associated calcium signals. Neither theory has been extensively tested experimentally, and indeed theoretical complications have been raised with both. Regarding the diffusible morphogen model, the enclosed nature of the node produced by the overlying Reichert's membrane means that morphogen would need to be subject to a temporal inactivation process in order to avoid diffusion-induced uniform distribution [8]. In respect of the mechanosensing model, it is unclear how the symmetric shear stresses associated with inertialess microscale flow could be sensed asymmetrically [8]. Moreover, recent observations have raised doubt regarding whether the primary cilia found in the node are capable of producing a calcium signal at physiological shear rates [22].

A later conceptual model [23] was based on the apparent observation of 'nodal vesicular parcels', membrane-enclosed vesicles containing morphogens, which were postulated to be released by microvilli from the floor of the node, transported leftward by the action of cilia, and then broken up by cilia at the left, whereupon morphogen would be absorbed. This model was attractive in that these parcels would have a lower diffusion coefficient than diffusible morphogen, and moreover would provide a mechanism for localised release. However, despite the appeal of this theory, it has also not yet been confirmed by further work.

A further puzzle – or perhaps a clue – was provided by the study of Shinohara *et. al* [24], in which *Dpcd* and *Rfx3* mutant mouse embryos expressing as few as two cilia were found to produce consistent situs solitus. Moreover, dramatic reduction in flow induced by raising the viscosity of the medium also did not result in disturbed symmetry-breaking. These findings in the mouse node are in stark contrast to the analogous Kupffer's vesicle structure in zebrafish, in which even relatively moderate reductions to cilia activity result in major perturbations to situs [25]. The dynamics of symmetry-breaking in this extremely deciliated system – for which we propose the nomenclature 'oligociliation' – present an interesting topic for theoretical study. Whatever the true mechanism is in mouse, it must be robust to reductions to two – but not one – motile cilia. Omori *et. al* [26] predicted through imaging-generated computational modelling that particle transport in the oligociliated node is greatly reduced, being tightly restricted to the region around the cilia. It was argued that these findings tend to refute the role for a transport-based mechanism. As an alternative, it was suggested that anisotropic bending stiffness of immotile cilia might enable these organelles to act as directional sensors. Building on an earlier suggestion by [10], a recent study [27] found that stresses induced by the cilium beat may be sufficient to promote vesicle release from ciliated cells, indicating that vesicles may only enter the system in regions in which transport can occur. A further possibility, raised during discussions at the Theo Murphy International Meeting associated with this volume, is that vesicles may be released from cilia themselves – again providing a local release mechanism.

In this manuscript we are motivated to progress the study of particle deposition patterns due to one, two, and many cilia, and to compare directly the effects of localised and widespread release. Working with an idealised model of the node which preserves the core features (concave ciliated surface, overlying membrane) and a recently-developed computational method for the Stokes flow equations (NEAREST [28]) we simulate larger numbers of particles than previously possible (approximately 1000 for each case) over periods of 10,000 beat cycles.

A key focus of the present study will be the transport of potential morphogen particles, and the influence of their origin of release in the node. Following a brief description of the mathematical model (section 2), these conceptual models of vesicle release will be assessed via simulation of oligociliated mouse nodes (section 3). Finally the models will be compared, and their consistency with reported experimental data will be discussed (section 4).

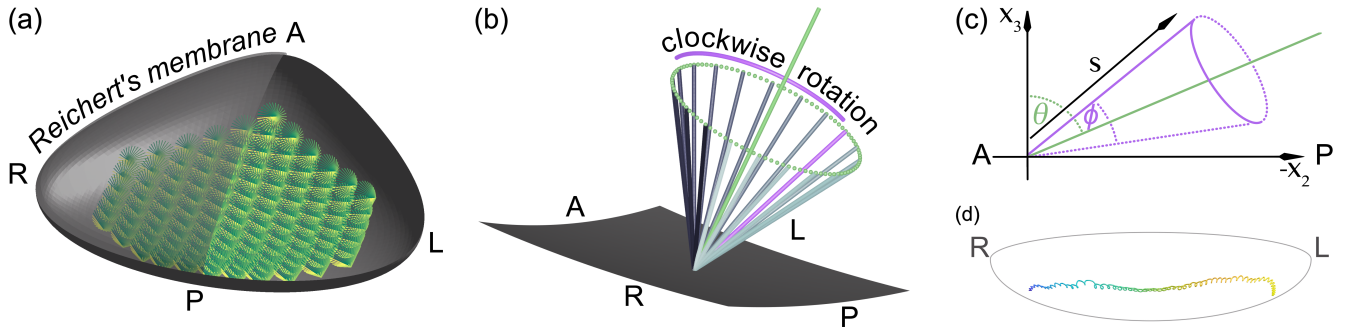

Figure 1: Sketch of (a) the geometry of the euciliated, 112 cilia mouse node with Reichert's membrane cut in half to show the whirling cilia, (b) schematic of an individual beating cilium shown above a section of the node, (c) sketch showing the posterior tilt  $\theta$  and semi-cone angle  $\phi$  for a model cilium, and (d) the characteristic 'loopy-drift' of a particle moving through the node. Note that right and left directions are transposed as is conventional in images of this system.

## 2 Particle transport in Stokes flow

The dynamics of particle transport in the embryonic node is dominated by the fluid velocity generated by beating cilia, and augmented by the inclusion of Brownian noise. The small length scales associated with the geometry of the node result in a low-Reynolds number regime, where viscous forces dominate inertia, resulting in a fluid behaviour that can be described by the dimensionless Stokes flow equations, namely

$$-\nabla p + \nabla^2 \mathbf{u} = 0, \quad \nabla \cdot \mathbf{u} = 0. \quad (1)$$

Here,  $p$  and  $\mathbf{u}$  denote the fluid pressure and velocity respectively and  $\nabla$  the gradient operator in three-dimensions. By placing a number of rigid cilia-like rods, rotating with fixed frequency, we can solve system (1) subject to the no-slip, no-penetration boundary conditions on both the walls and floor of the node ( $\mathbf{u}(\mathbf{x}, t) = \mathbf{0}$ ), and on the cilia ( $\mathbf{u}(\mathbf{x}, t) = \dot{\mathbf{x}}$ ). We discretise (1) over the node boundary using the meshfree regularised Stokeslet implementation NEAREST [28], via a coarse-force discretisation  $\mathbf{x}^b[n]$  ( $n = 1, \dots, N^b$ ), and corresponding fine-quadrature discretisation  $\mathbf{X}^c[q]$  ( $q = 1, \dots, Q^b$ ). For the rotating cilia we discretise into segments of equal length  $\Delta s$  located at  $\mathbf{x}^c[m]$  ( $m = 1, \dots, N^c$ ). For each cilium we employ a semi-analytic method [29], utilising a constant-force approximation over each segment, which allows for analytical integration of the regularised-Stokeslet kernel.

The problem for one cilium, with time dependence omitted for brevity, is given by

$$\begin{pmatrix} \mathcal{A}^{bb} & \mathcal{A}^{bc} \\ \mathcal{A}^{cb} & \mathcal{A}^{cc} \end{pmatrix} \begin{pmatrix} \mathbf{F}^b \\ \mathbf{F}^c \end{pmatrix} = \begin{pmatrix} \mathbf{0} \\ \dot{\mathbf{x}}^c \end{pmatrix}, \quad \mathcal{A}^{\lambda\mu} = \begin{pmatrix} A_{11}^{\lambda\mu} & A_{12}^{\lambda\mu} & A_{13}^{\lambda\mu} \\ A_{21}^{\lambda\mu} & A_{22}^{\lambda\mu} & A_{23}^{\lambda\mu} \\ A_{31}^{\lambda\mu} & A_{32}^{\lambda\mu} & A_{33}^{\lambda\mu} \end{pmatrix}, \quad \mathbf{F}^\lambda = \begin{pmatrix} F_1^\lambda \\ F_2^\lambda \\ F_3^\lambda \end{pmatrix}, \quad \dot{\mathbf{x}}^c = \begin{pmatrix} \dot{x}_1^c \\ \dot{x}_2^c \\ \dot{x}_3^c \end{pmatrix}, \quad (2)$$

where  $\lambda, \mu \in \{b, c\}$ , and

$$\begin{aligned} A_{ij}^{\lambda b} \{m, n\} &= \frac{1}{8\pi} \sum_{q=1}^{Q^b} S_{ij}(\mathbf{x}^\lambda[m], \mathbf{X}^b[q]) \nu[q, n] \quad \text{for } m = 1, \dots, N^\lambda, n = 1, \dots, N^b, \\ A_{ij}^{\lambda c} \{m, n\} &= \frac{1}{8\pi} \int_{s_n - \Delta s/2}^{s_n + \Delta s/2} S_{ij}(\mathbf{x}^\lambda[m], \mathbf{x}^c[n]) ds \quad \text{for } m = 1, \dots, N^\lambda, n = 1, \dots, N^c, \end{aligned} \quad (3)$$

where the integrals in (3) are calculated analytically [29], with  $s_n = (n - 1/2)\Delta s$  being the distance of point  $\mathbf{x}^c[n]$  along the cilium, and with the nearest-neighbour matrix  $\nu[q, n] = 1$  when

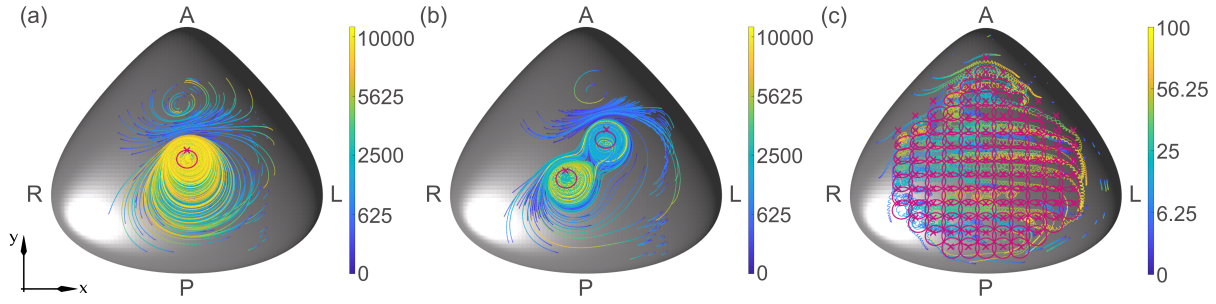

Figure 2: Simulated particle tracks for the (a) unciliated, (b) biciliated, and (c) euciliated mouse node. Particles were released randomly in  $x, y$  at a height of 0.2 cilium lengths above the node base. Each track is coloured with respect to time (in cilia beats, detailed in the associated bars). In each panel the positions of the cilia are indicated with a cross, with the trace of the cilia tips shown in magenta.

$n = \underset{\hat{n}=1, \dots, N^\lambda}{\operatorname{argmin}} |\mathbf{x}[\hat{n}] - \mathbf{X}[q]|$ , and 0 otherwise. The problem (2) can be initialised with the desired number of cilia by augmenting  $\mathbf{F}^c$  and  $\dot{\mathbf{x}}^c$  to take into account each cilia in order, for example by replacing  $\dot{\mathbf{x}}_1^c$  with  $\{\dot{\mathbf{x}}_1^{c1}, \dots, \dot{\mathbf{x}}_1^{cP}\}^T$  for  $P$  cilia.

For a collection of cilia rotating with the same fixed frequency, we can solve system (2) over a single beat, and exploit the periodic nature of the problem by fitting a Fourier series to the calculated forces  $\mathbf{F} = \{\mathbf{F}^b, \mathbf{F}^c\}$ , enabling ready estimation of these forces at any required time.

Solution of the resistance problem (2) allows for calculation of the velocity field everywhere in the node, for example at a set of  $N^p$  points  $\mathbf{x}^p = \{x_1^p, x_2^p, x_3^p\}^T$ , with corresponding fluid velocity at those points given by  $\mathbf{u}^p$ , and evaluating the reduced motility problem for the velocity  $\mathbf{u}^p = (\mathcal{A}^{pb}, \mathcal{A}^{pc}) (\mathbf{F}^b, \mathbf{F}^c)^T$ . Extracellular particle tracking is carried out by the stochastic differential equation under advection and diffusion,

$$d\mathbf{x}^p = \mathbf{u}^p dt + d\mathbf{W} \quad \text{with} \quad d\mathbf{W} \sim N_3(0, 2Ddt), \quad (4)$$

Here the addition of Brownian noise is modelled using the Stokes-Einstein relation, with variance  $\sigma^2 = 2Ddt$ , and diffusion constant  $D = k_B T / 6\pi\eta a$ , with  $k_B$  the Boltzmann constant,  $T$  temperature in Kelvin,  $\eta$  fluid dynamic viscosity, and  $a$  the particle radius.

To model the oligociliated mouse node we take the geometric outline of Smith *et al.* [15] improved with a more biologically realistic concave floor and a model of Reichert's membrane based on the microscopy images of Okada *et al.* [10]. Cilia are modelled as rigid rods with a semi-cone angle and posterior tilt of  $30^\circ$ . Numerical analysis of the convergence motivated the choice to model the geometry with 2000, 4000, and 256 vector degrees of freedom for stokeslet strength on Reichert's membrane, the nodal base, and rod-like cilia respectively, calculated over 32 time points for Fourier analysis. In the present work we investigate particle transport in two model systems, a unciliated node with cilium at the centre of the node  $(x, y) = (0, 0)$ , and a biciliated node with cilia offset at  $(x_1, y_1) = (-1, -1)$  and  $(x_2, y_2) = (1, 1)$ , where lengths have been scaled with respect to the length of a single cilium. For comparison between the mutant nodes and the wildtype, we also show calculations of a euciliated node with a more biologically realistic 112 cilia. Sketches for an individual beating cilium, and the geometry of the euciliated node are given in Figure 1.

### 3 Transport of particles in the mouse node

We investigate the potential for symmetry breaking via particle transport, paying particular attention to the difference in deposition in the case of the unciliated node compared to that with flow driven by two beating cilia (which we call the biciliated node). Initially particles are released at a height of 0.2 cilium lengths above the node base, with position drawn uniformly in  $(x, y)$  from within the

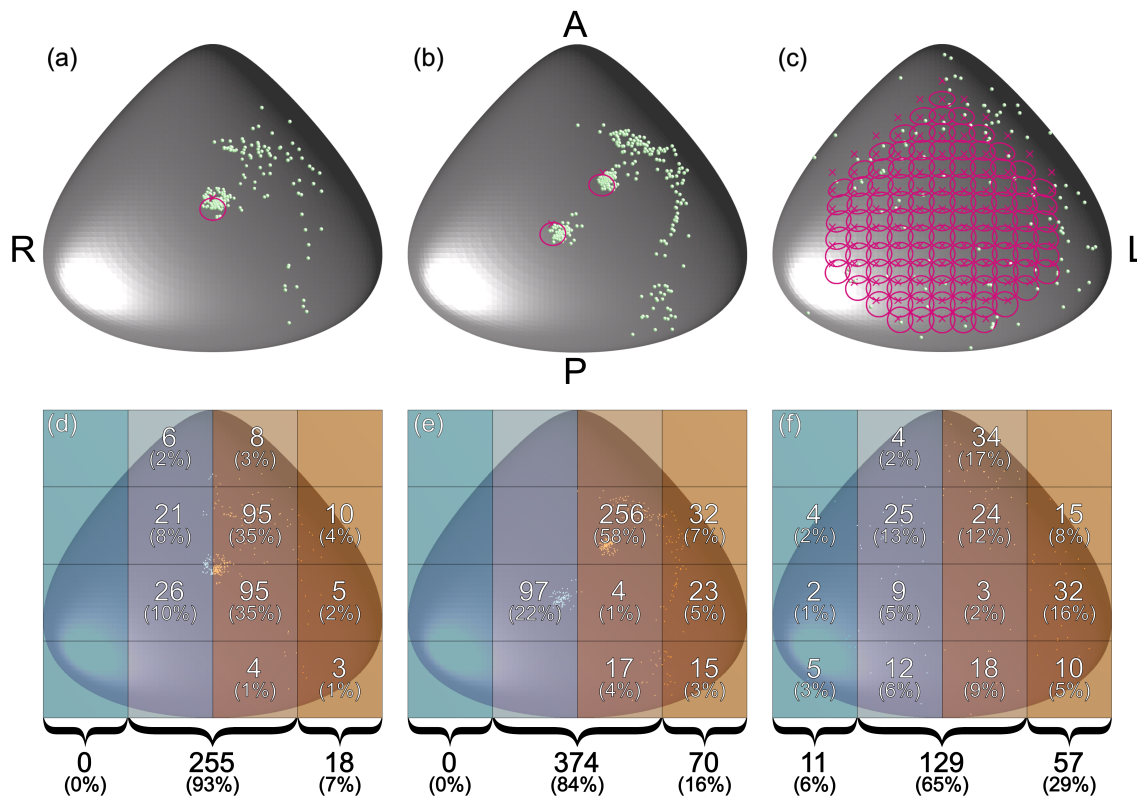

Figure 3: Deposition location of particles for the (a), (d) unciliated, (b), (e) biciliated, and (c), (f) euciliated mouse node. Particles were released uniformly randomly in  $x, y$  at a height of 0.2 cilium lengths above the node base. Panels (a) – (c) show particle deposition location as green balls, with cilia location marked by a cross, and path traced out by the cilia tips in magenta. Panels (d) – (f) are divided into 12 regions with the number (and percentage) of particles deposited within these regions indicated. At the bottom of these panels the number (and percentage) of particles deposited in the far left, centre, and far right of the node is shown.

node. In section 3.3 an alternative release hypothesis that particles are released directly from the cilium themselves is considered. Particle locations are updated following equation (4), and tracked for 10,000 beats or (as initialised by [26]) until they reach a height of 0.1 cilium lengths above the nodal floor, when they are considered deposited. The computational cost of the simulations contained within this manuscript was just over 3200 cpu hours.

### 3.1 Uniform release

The euciliated node is initialised with 200 uniformly randomly released particles, all of which are deposited in fewer than 100 cilium beats. In contrast the uni- and biciliated nodes deposited approximately one third of the released particles in the 10,000 beat time period, with no significant difference in percentage of deposited particles in these cases (746 released, 247 deposited in the unciliated node, 1328 released, 444 deposited in the biciliated node).

The particle tracks for each of the deposited particles are shown in figure 2. For each of the mutant mouse nodes we see a significant number of particles attracted towards the location of the cilia. Long-range transport of particles occurs in each case, with particles passing through a region directly anterior to the cilia being transported leftwards without being drawn into the deposition regions below the cilia. In contrast, the euciliated node (figure 2c) shows significant leftward transport of particles throughout the node. A selection of the individual paths can be seen in the supplementary material with figures S1 and S2 showing paths for the unciliated node, S3 – S9 the biciliated node, and S10 the euciliated node.

While the qualitative nature of transport in the uni- and biciliated nodes are similar, detailed

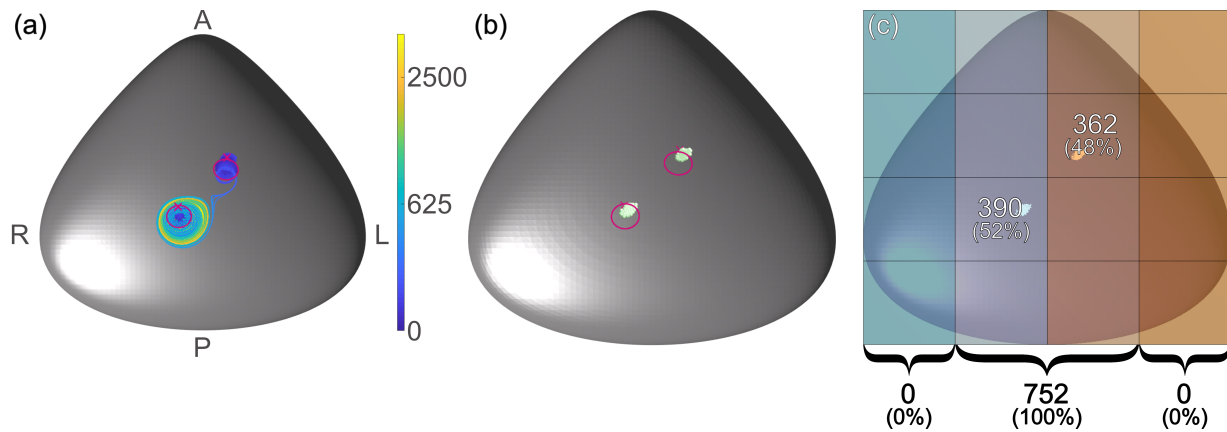

Figure 4: Results for particles released directly from the cilia of the biciliated mouse node. Panel (a) shows the simulated tracks, coloured according to time in beats with the cilia location marked with a cross and path traced out by the cilia tips shown in magenta. In panel (b) the deposition location of the particles is shown, with panel (c) showing the node divided into 12 regions with the number (and percentage) of particles deposited within these regions indicated. At the bottom of panel (c) the number (and percentage) of particles deposited in the far left, centre, and far right of the node is shown.

analysis of the particle deposition location (figure 3) reveals that a particle is more than twice as likely to be deposited in the far-left region of the node when there are two motile cilia present than one, with 7% and 16% of particles reaching these regions for the uni- and biciliated nodes respectively). While in both cases this is markedly less than for the euciliated node (29%), it highlights a significant difference between the mutants.

### 3.2 Near-cilium wall release

Solowiej-Wedderburn *et. al* [27] hypothesised that particle exocytosis may be enhanced by wall stress. Based on the finding that the wall stress is highest in the cells adjacent and posterior to the sweeping cilium, they argued that localised particle release may combine with cilia-driven flow to effect left-right asymmetry in particle concentrations. By considering the tracks of particles that initiate in this region we can now see that the region of fast flow local to the beating cilia is not the primary location for long-range leftwards particle transport in the oligociliated node. While particles in the near-cilium region have high velocity, it can be seen in figure 2 that paths in these regions are restricted in extent, which ensures local deposition rather than significant leftward bias. Instead, the primary region of long-range leftwards transport is in the lower-stress region anterior to the posterior-tilted cilia. This effect occurs because the inner field of the beating cilium is rotational, whereas the outer field is directional [30], an effect which can be explained by considering the image system of a rotlet near a plane boundary [12].

### 3.3 Cilium release

Another potential mechanism, suggested during discussions at the Theo Murphy International Meeting associated with this volume, is that the morphogen-laden particles may be released directly from the cilium itself. To test this hypothesis we release particles at a randomly chosen distance along the cilium  $0.2 < s < 1$  (where  $s$  is measured in cilium lengths) and at a random time in the beat cycle and solve for the particle trajectories, as before, until they are designated deposited or until 10,000 beats have elapsed. Figure 4 depicts the paths traced out by the 752 deposited particles ( $\approx 79\%$  of the 952 initialised particles), together with the deposition locations of each particle. While these figures show that some particles can be passed from a region close to the most leftward cilium to the most rightward, no extended transport is seen in the leftwards direction and all particle deposition

is confined to the central ciliated regions (48% and 52% deposited near the leftward and rightward cilia respectively), thereby having no significant left-right bias.

## 4 Discussion

In this manuscript we have addressed the problem of symmetry breaking in the mouse embryonic node through numerical simulation of the flow driven by motile cilia in the uni- and biciliated mutant, as well as a 112 cilium wildtype. We have shown that, if the signal-carrying particles are released uniformly throughout the node, then a single beating cilium is sufficient to effect some leftward bias in particle transport and deposition, with two beating cilia producing approximately double the amount of bias.

Two models for localised particle release were considered. The first, motivated by recent work [27], examined the idea of particle release from the high stress region localised to the wall region posterior to the beating cilia. The second, suggested in discussions at the Theo Murphy International meeting of March 2019, was that particles may be released from the motile cilia themselves. Despite the intuitive appeal of these models, neither produced significant particle transport in the oligociliated node, and hence do not appear to be consistent with experimental observations in mouse [24].

These observations lead us to hypothesise that, in the mouse at least, a morphogen-laden particle transport model may be feasible, with spatially-extended particle release being a more probable scenario than cilium-localised release. The situation may of course be different in other species, particularly in the other key experimental system of zebrafish Kupffer's vesicle, in which much greater ciliary activity is necessary for consistent *situs*. Furthermore, there is still a large morphology and parameter space to explore within the mouse system, taking into account variability in cilia position, length, phase, tilt angle and beat frequency, and indeed the detailed microarchitecture of the ciliated epithelium - significant further computational study to assess these features is required. Other localised release mechanisms may also be possible. For example if the posterior-tilted cilium exerts an elastic stress on the convex cell from which it protrudes, this may induce localised particle release in the directional flow region anterior to the cilium. We cannot therefore draw sweeping conclusions from the simulation studies presented here, but rather we offer these findings as part of the continuing dialogue between experiment and theory, and between molecular developmental biology and mechanics.

## 5 Acknowledgements

The authors would like to thank the organisers and participants of the Theo Murphy International Meeting associated with this volume, particularly for the insightful discussions that helped formulate some of the theories tested in this manuscript. We would like to thank Susana Lopes and her group at the Nova University of Lisbon for helpful discussions and on-going collaborations surrounding the symmetry-breaking problem in zebrafish. Finally, the authors would like to acknowledge the late John Blake who was fundamental in initiating and inspiring our work in this field.

## 6 Funding

MTG and DJS gratefully acknowledge support from the Engineering and Physical Sciences Research Council (EPSRC) Award No. EP/N021096/1. TDMJ gratefully acknowledges support from EPSRC Award No. EP/R041555/1.

## 7 Author contributions

MTG, DJS and TDMJ designed the research; MTG conducted simulations and analysed results; MTG, DJS and TDMJ co-wrote the paper.

## 8 Competing interests

We have no competing interests.

## References

- [1] B.A. Afzelius. A human syndrome caused by immotile cilia. *Science*, 193(4250):317–319, 1976.
- [2] W.E. Berdon, C. McManus, and B. Afzelius. More on Kartagener’s syndrome and the contributions of Afzelius and A.K. Siewert. *Ped. Radiol.*, 34(7):585–586, 2004. doi:10.1007/s00247-004-1203-y.
- [3] W.E. Berdon and U. Willi. Situs inversus, bronchiectasis, and sinusitis and its relation to immotile cilia: history of the diseases and their discoverers—Manes Kartagener and Bjorn Afzelius. *Ped. Radiol.*, 34(1):38–42, 2004. 10.1007/s00247-003-1072-9.
- [4] K. Sulik, D.B. Dehart, T. Inagaki, J.L. Carson, T. Vrablic, K. Gesteland, and G.C. Schoenwolf. Morphogenesis of the murine node and notochordal plate. *Dev. Dyn.*, 201(3):260–278, 1994. doi:10.1002/aja.1002010309.
- [5] S. Nonaka, Y. Tanaka, Y. Okada, S. Takeda, A. Harada, Y. Kanai, M. Kido, and N. Hirokawa. Randomization of left–right asymmetry due to loss of nodal cilia generating leftward flow of extraembryonic fluid in mice lacking KIF3B motor protein. *Cell*, 95(6):829–837, 1998. doi:10.1016/S0092-8674(00)81705-5.
- [6] Y. Okada, S. Nonaka, Y. Tanaka, Y. Saijoh, H. Hamada, and N. Hirokawa. Abnormal nodal flow precedes *situs inversus* in *iv* and *inv* mice. *Mol. Cell*, 4(4):459–468, 1999.
- [7] S. Nonaka, H. Shiratori, Y. Saijoh, and H. Hamada. Determination of left–right patterning of the mouse embryo by artificial nodal flow. *Nature*, 418(6893):96, 2002. doi:10.1038/nature00849.
- [8] J.H.E. Cartwright, O. Piro, and I. Tuval. Fluid-dynamical basis of the embryonic development of left-right asymmetry in vertebrates. *Proc. Natl. Acad. Sci. USA*, 101(19):7234–7239, 2004.
- [9] S. Nonaka, S. Yoshida, D. Watanabe, S. Ikeuchi, T. Goto, W.F. Marshall, and H. Hamada. De novo formation of left–right asymmetry by posterior tilt of nodal cilia. *PLoS Biol.*, 3(8):e268, 2005. doi:10.1371/journal.pbio.0030268.
- [10] Y. Okada, S. Takeda, Y. Tanaka, J.-C.I. Belmonte, and N. Hirokawa. Mechanism of nodal flow: a conserved symmetry breaking event in left-right axis determination. *Cell*, 121(4):633–644, 2005.
- [11] C.J. Brokaw. Computer simulation of flagellar movement IX. Oscillation and symmetry breaking in a model for short flagella and nodal cilia. *Cell Motil. Cytoskel.*, 60(1):35–47, 2005.
- [12] D.J. Smith, E.A. Gaffney, and J.R. Blake. Discrete cilia modelling with singularity distributions: application to the embryonic node and the airway surface liquid. *B. Math. Biol.*, 69(5):1477–1510, 2007. doi:10.1007/s11538-006-9172-y.
- [13] D.J. Smith, J.R. Blake, and E.A. Gaffney. Fluid mechanics of nodal flow due to embryonic primary cilia. *J. R. Soc. Interface*, 5(22):567–573, 2008. doi:10.1098/rsif.2007.1306.



- [14] M. Hashimoto, K. Shinohara, J. Wang, S. Ikeuchi, S. Yoshida, C. Meno, S. Nonaka, S. Takada, K. Hatta, A. Wynshaw-Boris, and H. Hamada. Planar polarization of node cells determines the rotational axis of node cilia. *Nat. Cell Biol.*, 12(2):170, 2010.
- [15] D.J. Smith, A.A. Smith, and J.R. Blake. Mathematical embryology: the fluid mechanics of nodal cilia. *J. Eng. Math.*, 70(1-3):255–279, 2011.
- [16] J.J. Essner, J.D. Amack, M.K. Nyholm, E.B. Harris, and H.J. Yost. Kupffer’s vesicle is a ciliated organ of asymmetry in the zebrafish embryo that initiates left-right development of the brain, heart and gut. *Development*, 132(6):1247–1260, 2005.
- [17] A.G. Kramer-Zucker, F. Olale, C.J. Haycraft, B.K. Yoder, A.F. Schier, and I.A. Drummond. Cilia-driven fluid flow in the zebrafish pronephros, brain and Kupffer’s vesicle is required for normal organogenesis. *Development*, 132(8):1907–1921, 2005.
- [18] D.J. Smith, T.D. Montenegro-Johnson, and S.S. Lopes. Symmetry-breaking cilia-driven flow in embryogenesis. *Annu. Rev. Fluid Mech.*, 51:105–128, 2019.
- [19] K. Shinohara and H. Hamada. Cilia in left–right symmetry breaking. *Cold Spring Harbor perspectives in biology*, 9(10):a028282, 2017.
- [20] A. Schweickert, T. Ott, S. Kurz, M. Tingler, M. Maerker, F. Fuhl, and M. Blum. Vertebrate left-right asymmetry: What can nodal cascade gene expression patterns tell us? *J. Cardiovasc. Devel. Dis.*, 5(1):1, 2018.
- [21] J. McGrath, S. Somlo, S. Makova, X. Tian, and M. Brueckner. Two populations of node monocilia initiate left-right asymmetry in the mouse. *Cell*, 114(1):61–73, 2003.
- [22] M. Delling, A.A. Indzhukulian, X. Liu, Y. Li, T. Xie, D.P. Corey, and D.E. Clapham. Primary cilia are not calcium-responsive mechanosensors. *Nature*, 531(7596):656, 2016. doi:10.1038/nature17426.
- [23] Y. Tanaka, Y. Okada, and N. Hirokawa. FGF-induced vesicular release of Sonic hedgehog and retinoic acid in leftward nodal flow is critical for left–right determination. *Nature*, 435(7039):172, 2005.
- [24] K. Shinohara, A. Kawasumi, A. Takamatsu, S. Yoshida, Y. Botilde, N. Motoyama, W. Reith, B. Durand, H. Shiratori, and H. Hamada. Two rotating cilia in the node cavity are sufficient to break left–right symmetry in the mouse embryo. *Nat. Commun.*, 3:622, 2012.
- [25] P. Sampaio, R.R. Ferreira, A. Guerrero, P. Pintado, B. Tavares, J. Amaro, A.A. Smith, T. Montenegro-Johnson, D.J. Smith, and S.S. Lopes. Left-right organizer flow dynamics: how much cilia activity reliably yields laterality? *Dev. Cell*, 29(6):716–728, 2014.
- [26] T. Omori, K. Winter, K. Shinohara, H. Hamada, and T. Ishikawa. Simulation of the nodal flow of mutant embryos with a small number of cilia: comparison of mechanosensing and vesicle transport hypotheses. *Royal Soc. Open Sci.*, 5(8):180601, 2018.
- [27] J. Solowiej-Wedderburn, D.J. Smith, S.S. Lopes, and T.D. Montenegro-Johnson. Wall stress enhanced exocytosis of extracellular vesicles as a possible mechanism of left-right symmetry-breaking in vertebrate development. *J. Theor. Biol.*, 460:220–226, 2019.
- [28] M.T. Gallagher and D.J. Smith. Meshfree and efficient modeling of swimming cells. *Phys. Rev. Fluids*, 3(5):053101, 2018.
- [29] D.J. Smith. A boundary element regularized stokeslet method applied to cilia-and flagella-driven flow. *Proc. Royal Soc. A*, 465(2112):3605–3626, 2009.
